# Supplementary material
Source: Springer Nature journal article supplement (https://www.springermedizin.de/resource/supplementary/12879_2011_1886_MOESM5_ESM.pdf/9443922)

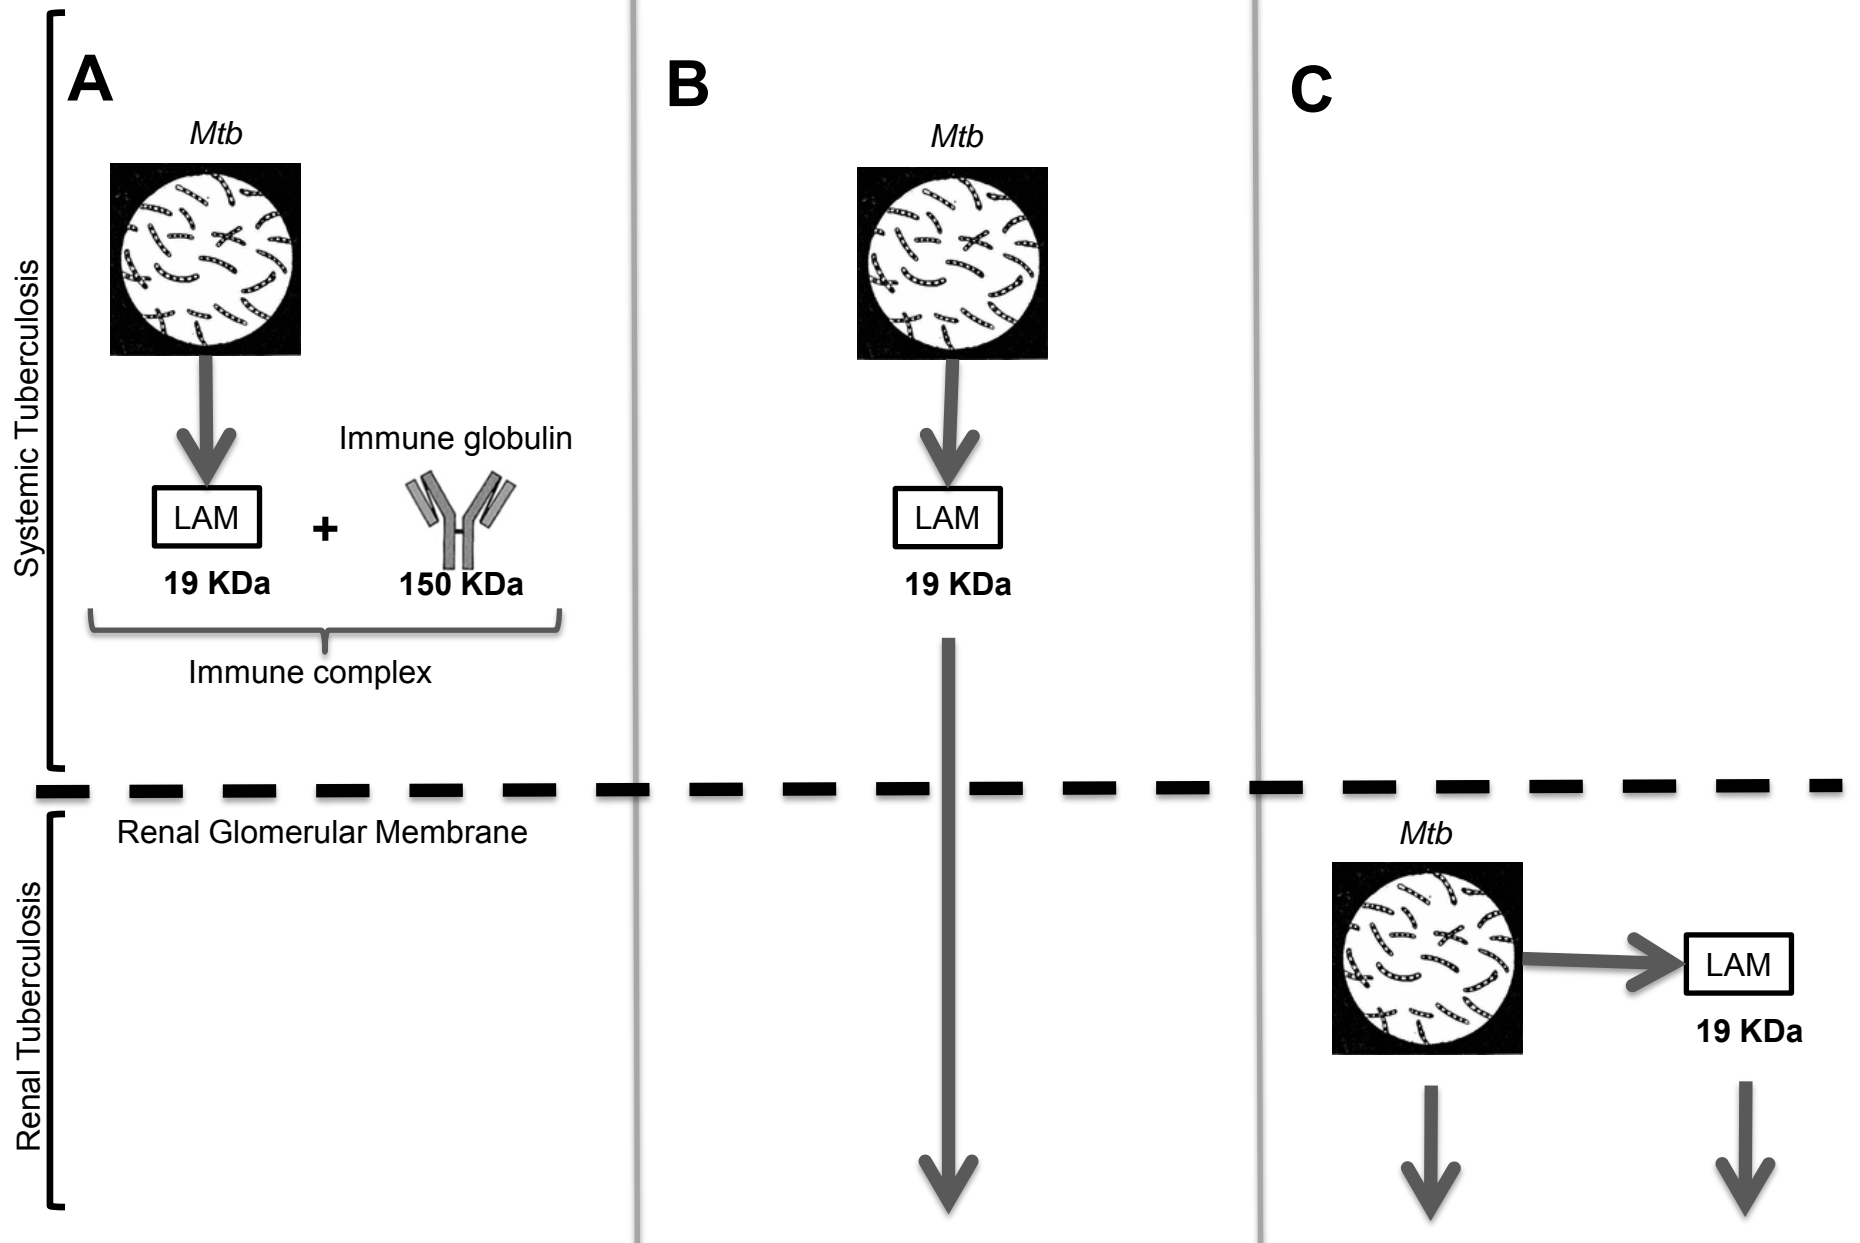

|                         |          |          |          |
|-------------------------|----------|----------|----------|
| <b>Urine <i>Mtb</i></b> | Negative | Negative | Positive |
| <b>Urine LAM</b>        | Negative | Positive | Positive |

Supplement: MOESM5 [file 9443922]
